# Supplementary material for: Amount of bird suitable areas under climate change is modulated by morphological, ecological and geographical traits
Source: Frontiers journal article supplement (doi:10.3389/fevo.2022.987204), 2022-09-28
Supplement: Table_1.XLSX [file Table_1.XLSX]

## Sheet: studies
Study	DOI
Abolafya et al., 2013	10.1371/journal.pone.0068037
Almpanidou et al., 2020	10.1007/s10980-020-01025-5
Andriamasimanana and Cameron, 2013	10.1002/ece3.497
Avalos and Hernández, 2015	10.1016/j.gecco.2015.08.004
Barbet-Massin and Jiguet, 2011	10.1371/journal.pone.0018228
Bladon et al., 2021	10.1371/journal.pone.0249633
Brambilla et al., 2015	10.1007/s10344-014-0864-6
Brambilla et al., 2016	10.1111/jbi.12796
Brambilla et al., 2020	10.1111/gcb.14953
Braunisch et al., 2013	10.1111/j.1600-0587.2013.00138.x
Chauvenet et al., 2013	10.1111/1365-2664.12150
Coetzee et al., 2009	10.1111/j.1466-8238.2009.00485.x
Colyn et al., 2020	10.1093/condor/duz064
Condro et al., 2022	10.1016/j.gecco.2022.e02044
Cursach et al., 2019	10.7717/peerj.7642
Da Silveira et al., 2021	10.1093/ornithapp/duab006
Fortini et al., 2015	10.1371/journal.pone.0140389
Friggens and Finch, 2015	10.1371/journal.pone.0144089
Gamundani et al., 2020	10.1111/aje.12703
Gong et al., 2021	10.17582/journal.pjz/20181205011224
Gottschalk and Reiners, 2015	10.1007/s13595-014-0455-4
Han et al., 2018	10.1007/s10113-018-1336-4
Harris et al., 2014	10.1111/ddi.12180
Harris, J. Berton C. et al., 2012	10.1111/j.1365-2664.2012.02163.x
Hernando et al., 2021	10.1111/ecog.05593
Hoecker and Turner, 2022	10.1111/ddi.13470
Hoffmann et al., 2020	10.1016/j.pecon.2020.10.005
Jose V and Nameer, 2020	10.1016/j.ecolind.2019.105930
Kiss et al., 2020	10.1080/00063657.2020.1784842
Langham et al., 2015	10.1371/journal.pone.0135350
Legault et al., 2013	10.1016/j.biocon.2013.07.041
Li et al., 2013	10.1007/s10113-012-0344-z
Liu et al., 2020	10.1371/journal.pone.0229984
Lu et al., 2021	10.1016/j.gecco.2021.e01817
Marini et al., 2009a	10.1016/j.biocon.2009.08.002
Marini et al., 2009b	10.1111/j.1523-1739.2009.01258.x
Menon et al., 2009	*
Methorst et al., 2017	10.1111/jav.01299
Miranda et al., 2019	10.1371/journal.pone.0215229
Moghadam et al., 2021	10.1016/j.ecocom.2021.100952
Monadjem et al., 2013	10.1017/S0959270912000330
Nagy et al., 2021	10.1017/S0959270921000150
Nixon et al., 2016	10.5751/ACE-00866-110202
Pearman et al., 2010	10.1111/j.1600-0587.2010.06443.x
Peterson et al., 2001	10.1016/S0304-3800(01)00345-3
Porfirio et al., 2016	10.1071/MU15094
Powers and Jetz, 2019	10.1038/s41558-019-0406-z
Ralston and Kirchman, 2013	10.1007/s10592-012-0418-y
Ramirez-Villegas et al., 2014	10.1016/j.jnc.2014.03.007
Rodenhouse et al., 2008	10.1007/s11027-007-9126-1
Sáenz-Jiménez et al., 2021	10.1017/S0959270920000271
Salas et al., 2017	10.3934/environsci.2017.2.358
Sales et al., 2021	10.1111/geb.13271
Sharkey et al., 2013	10.3318/BIOE.2013.20
Sheykhi Ilanloo et al., 2021	10.1177/1758155920962750
Sierra-Morales et al., 2021	10.1016/j.gecco.2021.e01794
Singh et al., 2020	10.1016/j.crm.2020.100241
Singh et al., 2021a	10.3390/su13052792
Singh et al., 2021b	10.3390/ijgi10070463
Smith et al., 2013	10.1111/ddi.12025
Sohl, 2014	10.1371/journal.pone.0112251
Soultan et al., 2022	10.1088/1748-9326/ac4ebe
Sreekumar and Nameer, 2021	10.18520/cs/v121/i10/1335-1342
Steen and Powell, 2012	10.1675/063.035.0204
Sutton et al., 2022	10.1111/ibi.13046
Synes and Osborne, 2011	10.1111/j.1466-8238.2010.00635.x
Vale et al., 2018	10.7717/peerj.4689
Vásquez-Aguilar et al., 2021	10.1177/19400829211030834
Velásquez-Tibatá et al., 2013	10.1007/s10113-012-0329-y
Virkkala et al., 2008	10.1016/j.biocon.2008.03.007
von dem Bussche et al., 2008	10.1007/s10336-008-0295-9
Xu et al., 2020	10.1016/j.gecco.2020.e01018
Yun et al., 2020	10.1016/j.gecco.2020.e00976
Zheng et al., 2016	10.1016/j.biocon.2016.11.004
Zucchetto et al., 2021	10.5751/ACE-01893-160229
*Menon, S., and Peterson, A. T. (2009). Projected Climate Change Effects on Nuthatch Distribution. The Raffles Bulletin of Zoology 57, 569–575.

## Sheet: var-description
Variable	Description
Body mass	Mass compiled by Tobias et al. (2022)
Climate stability	Difference between the annual mean temperature (BIO1) of future* and baseline scenarios from WorldClim v2.1 website in ºC
Diet	Trophic.Niche compiled by Tobias et al. (2022): Aquatic predator, Frugivore, Granivore, Herbivore aquatic, Herbivore terrestrial, Invertivore, Nectarivore, Omnivore, Scavenger, and Vertivore
Habitat type	Habitat compiled by Tobias et al. (2022): Coastal, Desert, Forest, Grasslad, Human Modified, Marine, Riverine, Rock, Shrubland, Wetland, and Woodland
Movement pattern	Migration compiled by Tobias et al. (2022): 1 - Resident, 2 and 3 - Migrant
Proportion of birds' suitable area in the future	Suitable area in the future divided by suitable area in the baseline scenario in km²
Range size	Suitable area in the baseline scenario or Range.Size of species distribution compiled by Tobias et al. (2022) in km²
Realm	Biogeographical realm from Olsen et al. (2001): Afrotropic, Australasia, Indo-Malay, Neartic, Neotropic, Oceania, and Paleartic
*GCM: MIROC6, spatial resolution: 2.5 arcmin, period: 2041-2060, ssp545 (better continental GCM based on Cannon 2020, doi: 10.1088/1748-9326/ab7e4f)

## Sheet: rank-models
Rank	Model	df	AICc	delta	weight
1	Habitat + Range + Mass + Realm	23	8179.28	0	0.33554
2	Habitat + Range + Realm	22	8179.77	0.482897	0.263563
3	Habitat + Range + Mass + Movement pattern + Realm	24	8180.68	1.39439	0.167092
4	Habitat + Range + Movement pattern + Realm	23	8181.38	2.09134	0.117928
5	Range + Realm	12	8182.94	3.65296	0.0540149
6	Range + Mass + Realm	13	8184.66	5.3729	0.0228578
7	Range + Movement pattern + Realm	13	8184.9	5.61176	0.0202846
8	Range + Mass + Movement pattern + Realm	14	8186.62	7.33306	0.00857811
9	Diet + Range + Mass + Realm	22	8190.25	10.9681	0.00139332
10	Diet + Habitat + Range + Mass + Realm	32	8190.28	10.9944	0.00137514
11	Diet + Range + Realm	21	8190.39	11.1069	0.00129994
12	Habitat + Mass + Realm	22	8191	11.714	0.000959568
13	Habitat + Realm	21	8191.22	11.935	0.000859205
14	Diet + Habitat + Range + Realm	31	8191.68	12.3916	0.000683836
15	Diet + Habitat + Range + Mass + Movement pattern + Realm	33	8191.74	12.4538	0.000662898
16	Diet + Range + Mass + Movement pattern + Realm	23	8191.93	12.6484	0.000601424
17	Diet + Range + Movement pattern + Realm	22	8192.16	12.8761	0.000536711
18	Habitat + Mass + Movement pattern + Realm	23	8192.59	13.3033	0.000433472
19	Habitat + Movement pattern + Realm	22	8192.97	13.687	0.000357801
20	Diet + Habitat + Range + Movement pattern + Realm	32	8193.36	14.0761	0.000294556
21	Realm	11	8193.65	14.3634	0.000255133
22	Mass + Realm	12	8195.41	16.1225	0.000105876
23	Movement pattern + Realm	12	8195.63	16.3503	9.44751e-05
24	Habitat + Range	16	8196.62	17.3401	5.75968e-05
25	Habitat + Range + Mass	17	8197.09	17.8027	4.57022e-05
26	Mass + Movement pattern + Realm	13	8197.39	18.1104	3.91851e-05
27	Habitat + Range + Movement pattern	17	8197.98	18.6975	2.92166e-05
28	Habitat + Range + Mass + Movement pattern	18	8198.6	19.3141	2.14655e-05
29	Diet + Mass + Realm	21	8201.65	22.368	4.66224e-06
30	Range + Movement pattern	7	8201.72	22.4338	4.51136e-06
31	Diet + Realm	20	8201.74	22.4593	4.4543e-06
32	Range	6	8202.11	22.8259	3.70817e-06
33	Diet + Habitat + Mass + Realm	31	8202.17	22.8832	3.60343e-06
34	Diet + Habitat + Realm	30	8203.4	24.1144	1.94698e-06
35	Diet + Mass + Movement pattern + Realm	22	8203.44	24.1536	1.90927e-06
36	Diet + Movement pattern + Realm	21	8203.6	24.3155	1.76074e-06
37	Range + Mass + Movement pattern	8	8203.69	24.4061	1.68275e-06
38	Diet + Habitat + Mass + Movement pattern + Realm	32	8203.8	24.5194	1.59008e-06
39	Range + Mass	7	8204.06	24.7721	1.40138e-06
40	Diet + Habitat + Movement pattern + Realm	31	8205.21	25.926	7.87036e-07
41	Diet + Range	15	8205.41	26.1307	7.10447e-07
42	Diet + Range + Mass	16	8205.86	26.574	5.69216e-07
43	Diet + Range + Movement pattern	16	8206.29	27.007	4.58408e-07
44	Diet + Range + Mass + Movement pattern	17	8206.86	27.5788	3.44418e-07
45	Diet + Habitat + Range + Mass	26	8206.98	27.6944	3.2508e-07
46	Diet + Habitat + Range	25	8207.97	28.6882	1.97777e-07
47	Diet + Habitat + Range + Mass + Movement pattern	27	8208.44	29.1532	1.56753e-07
48	Diet + Habitat + Range + Movement pattern	26	8209.18	29.8928	1.08293e-07
49	Habitat + Movement pattern	16	8220.95	41.6705	2.99993e-10
50	Habitat	15	8221.08	41.7958	2.8177e-10
51	Habitat + Mass	16	8221.8	42.5186	1.96309e-10
52	Habitat + Mass + Movement pattern	17	8221.92	42.6378	1.84953e-10
53	Movement pattern	6	8222.96	43.6759	1.10065e-10
54	Mass + Movement pattern	7	8224.89	45.6017	4.20209e-11
55	NULL	5	8225.72	46.4344	2.77104e-11
56	Mass	6	8227.58	48.297	1.09188e-11
57	Diet + Movement pattern	15	8228.09	48.8019	8.48293e-12
58	Diet + Mass + Movement pattern	16	8228.74	49.4597	6.10533e-12
59	Diet	14	8228.97	49.6868	5.45001e-12
60	Diet + Mass	15	8229.43	50.144	4.33614e-12
61	Diet + Habitat + Mass	25	8231.62	52.3347	1.45015e-12
62	Diet + Habitat + Mass + Movement pattern	26	8231.66	52.3746	1.42147e-12
63	Diet + Habitat + Movement pattern	25	8232.18	52.8931	1.09687e-12
64	Diet + Habitat	24	8232.58	53.2944	8.97463e-13
